# Supplementary material
Source: PubMed Central journal article supplement (PMC7686957)
Supplement: NIHMS1645788-supplement-1.pdf [file NIHMS1645788-supplement-1.pdf]

**Supplemental Information**

**TFEB Transcriptional Responses Reveal Negative**

**Feedback by BHLHE40 and BHLHE41**

**Kimberly L. Carey, Geraldine L.C. Paulus, Lingfei Wang, Dale R. Balce, Jessica W. Luo, Phil Bergman, Ianina C. Ferder, Lingjia Kong, Nicole Renaud, Shantanu Singh, Maria Kost-Alimova, Beat Nyfeler, Kara G. Lassen, Herbert W. Virgin, and Ramnik J. Xavier**

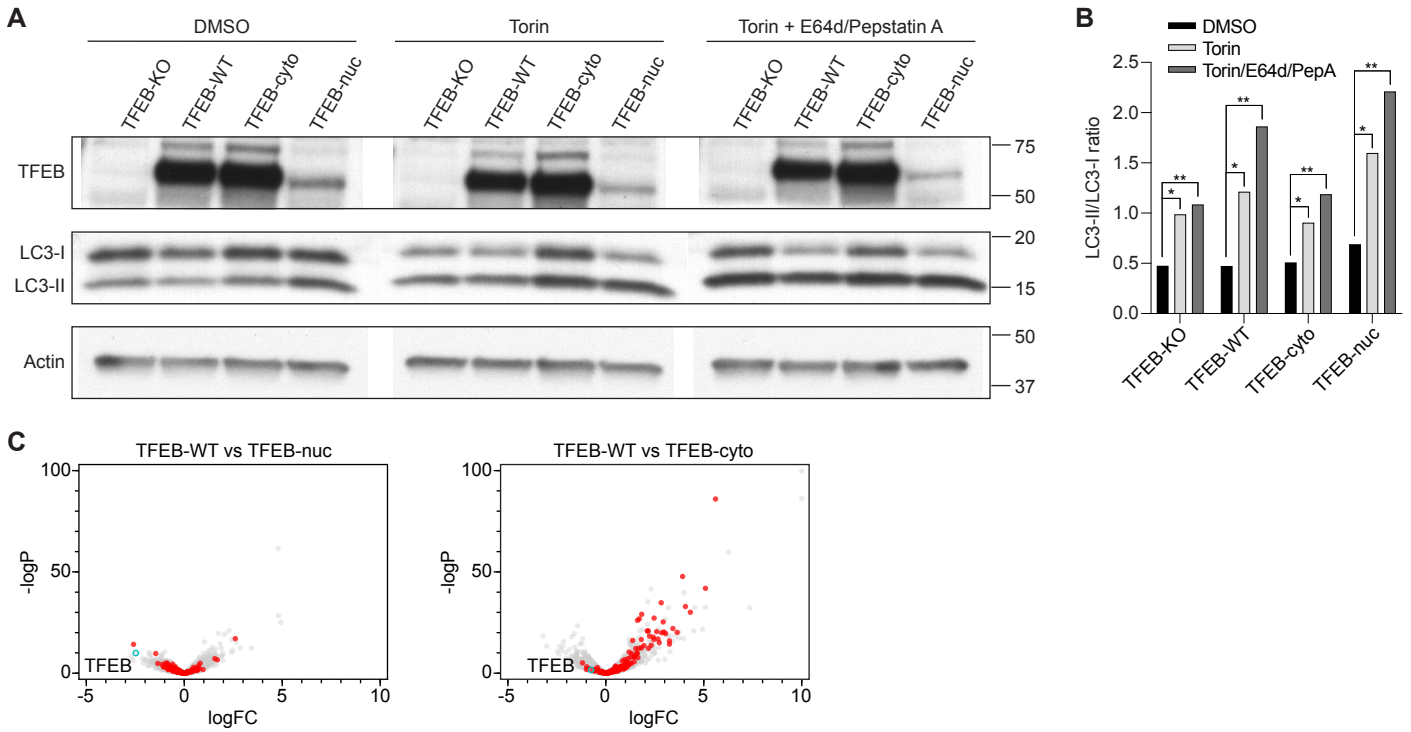

**Figure S1. TFEB nuclear translocation is necessary for robust autophagy induction and transcriptional response. Related to Figure 1.** Representative immunoblot (**A**) and quantification (**B**) of LC3 conversion in TFEB-KO and reconstituted HeLa cell lines treated with DMSO (0.1%), Torin (1 $\mu$ M), or a combination of Torin and E64d/Pepstatin A for 4hrs. Quantification of LC3-II/LC3-I ratio was normalized to actin loading control. Data are representative of three independent experiments and were analyzed using ordinary two-way ANOVA and Tukey's multiple comparisons test with individual variances for each comparison. Data are represented as mean  $\pm$  SEM (standard error of the mean). \* $p$ <0.05, \*\* $p$ <0.01. **C**) Cells were processed for RNA sequencing. Transcriptional responses to TFEB expression and localization are shown in volcano plots, where TFEB transcript is shown in cyan and a subset of known TFEB target genes (Table S1) (Sardiello et al., 2009) are shown in red.

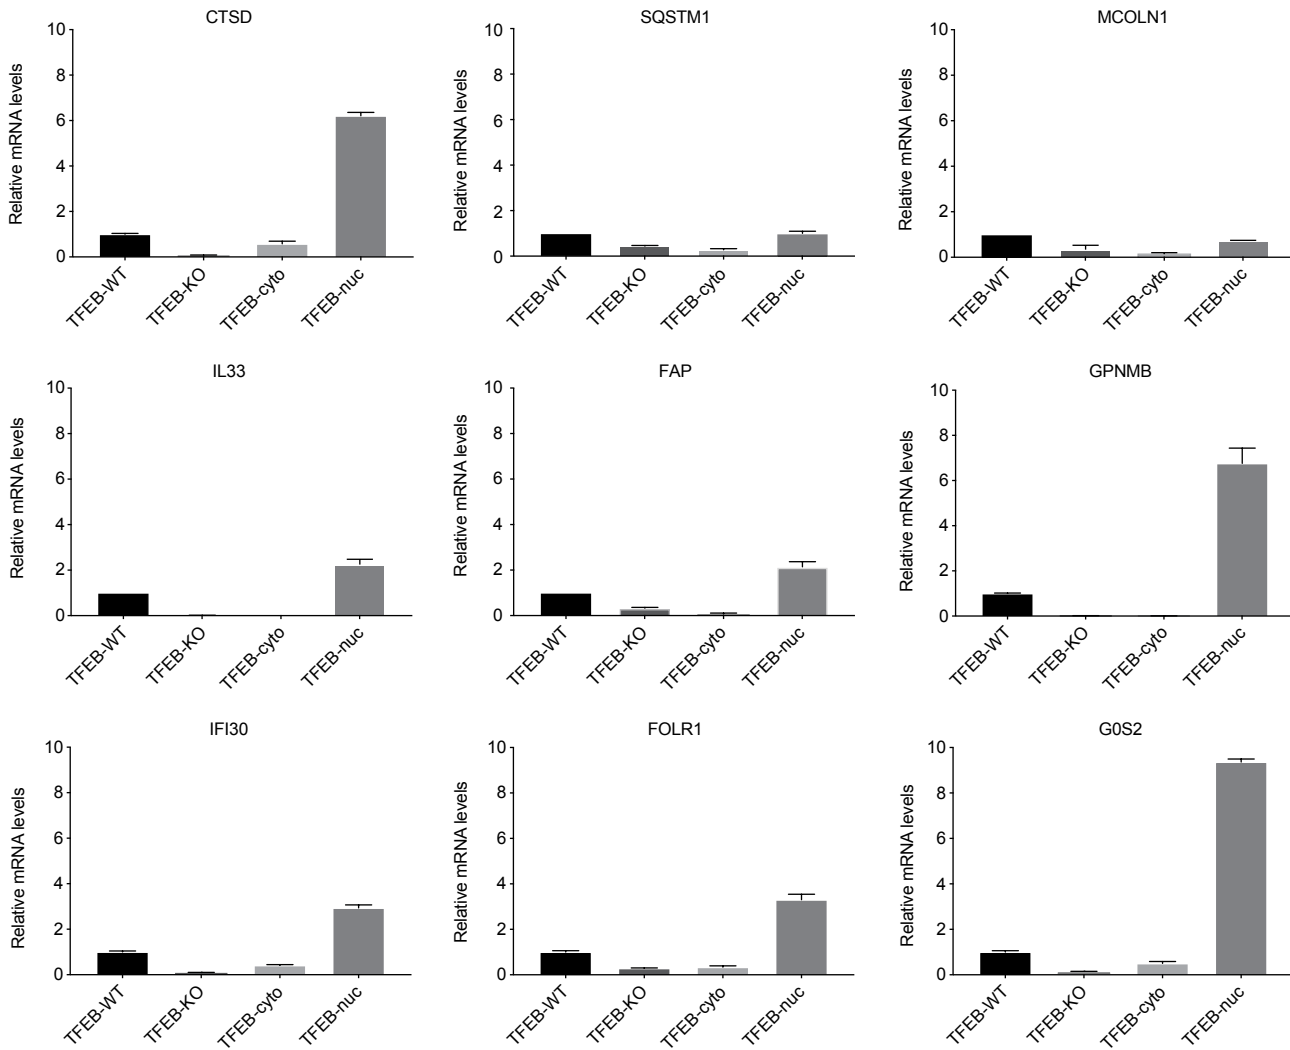

**Figure S2. Quantitative PCR analysis confirms TFEB target genes are upregulated in response to TFEB nuclear localization. Related to Figure 2 and Table S2.** Gene expression of select TFEB target genes in TFEB-KO, TFEB-WT, TFEB-cyto, and TFEB-nuc cells as quantified by qRT-PCR. Data shown are the average of duplicate wells and representative of three independent experiments. Data are represented as mean +/- SEM (standard error of the mean).

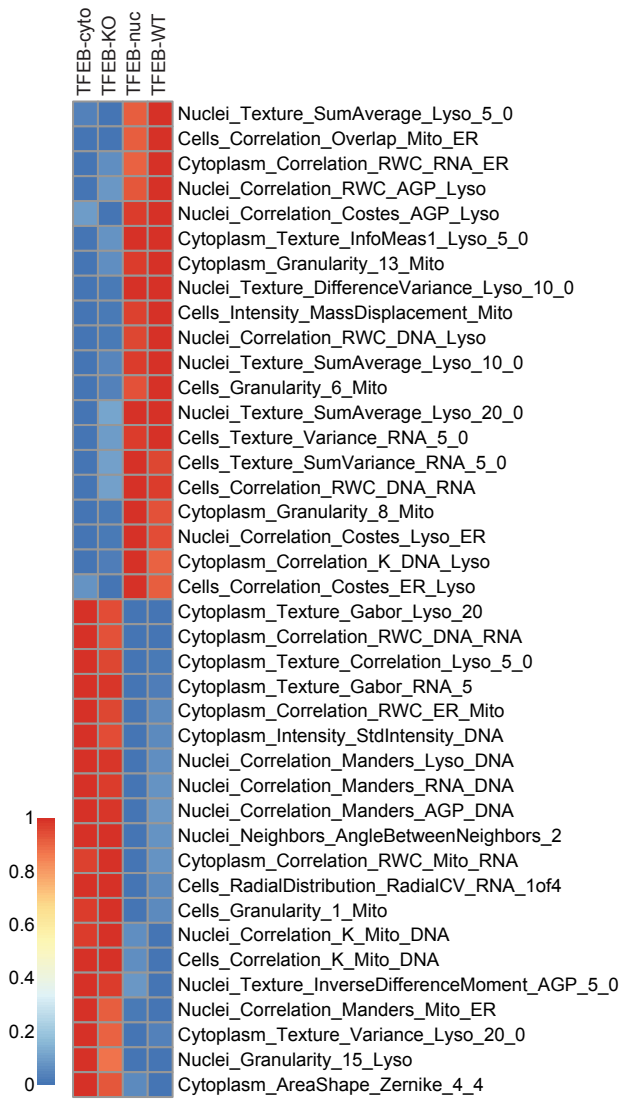

**Figure S3. Cell Painting analysis identifies subcellular phenotypic responses to TFEB expression and localization. Related to Figure 3.** Heat map representing Morpheus analysis of the most significant cellular features by t-test illustrates phenotypic differentiation of TFEB-WT/TFEB-nuc from TFEB-KO/TFEB-cyto cells. Columns indicate cell type and rows indicate Cell Painting features [Compartment]\_[FeatureGroup]\_[Feature]\_[Channel]\_[Parameters] (Bray et al., 2016).

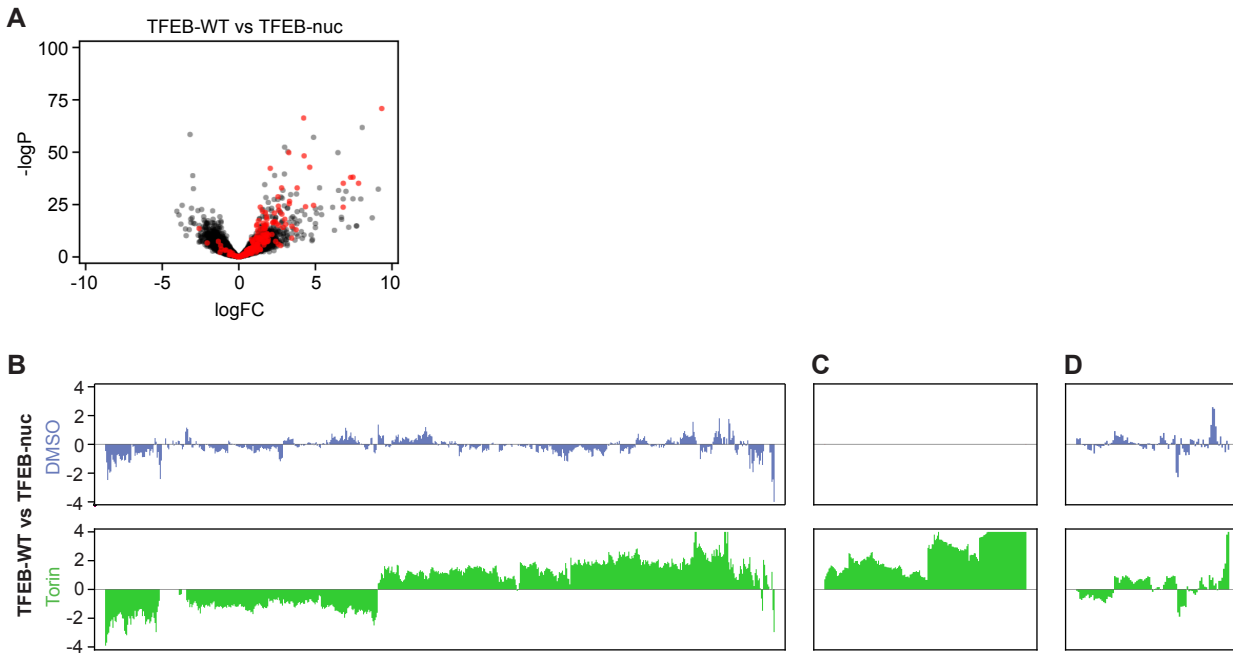

**Figure S4. Expression of TFEB-WT, but not TFEB-nuc, upregulated transcription in response to Torin treatment. Related to Figure 4 and Table S4. A)** Volcano plot of genes differentially expressed in TFEB-WT cells as compared to TFEB-nuc following Torin treatment. Shown in red are a subset of known TFEB target genes (Table S1) (Sardiello et al., 2009). **B-D)** Panels show differential gene expression at steady-state (DMSO, blue) and with Torin treatment (green). Each bar corresponds to a gene, and the y-axis represents log fold change of differential gene expression (truncated  $\log_{FC} + / - \ln 4$ ). Genes represented in the bar plots are all genes with significant differential expression ( $\log_{FC} > \ln 4$  or  $\log_{FC} < -\ln 4$  and  $q\text{-value} < 0.01$ ) in TFEB-WT relative to TFEB-nuc following Torin treatment. Panel **B** represent genes significantly upregulated with Torin treatment, panel **C** represents genes significantly upregulated with Torin treatment and not transcribed at detectable levels without Torin stimulation, and panel **D** represents TFEB-dependent genes for which transcription did not significantly change in response to Torin stimulation.

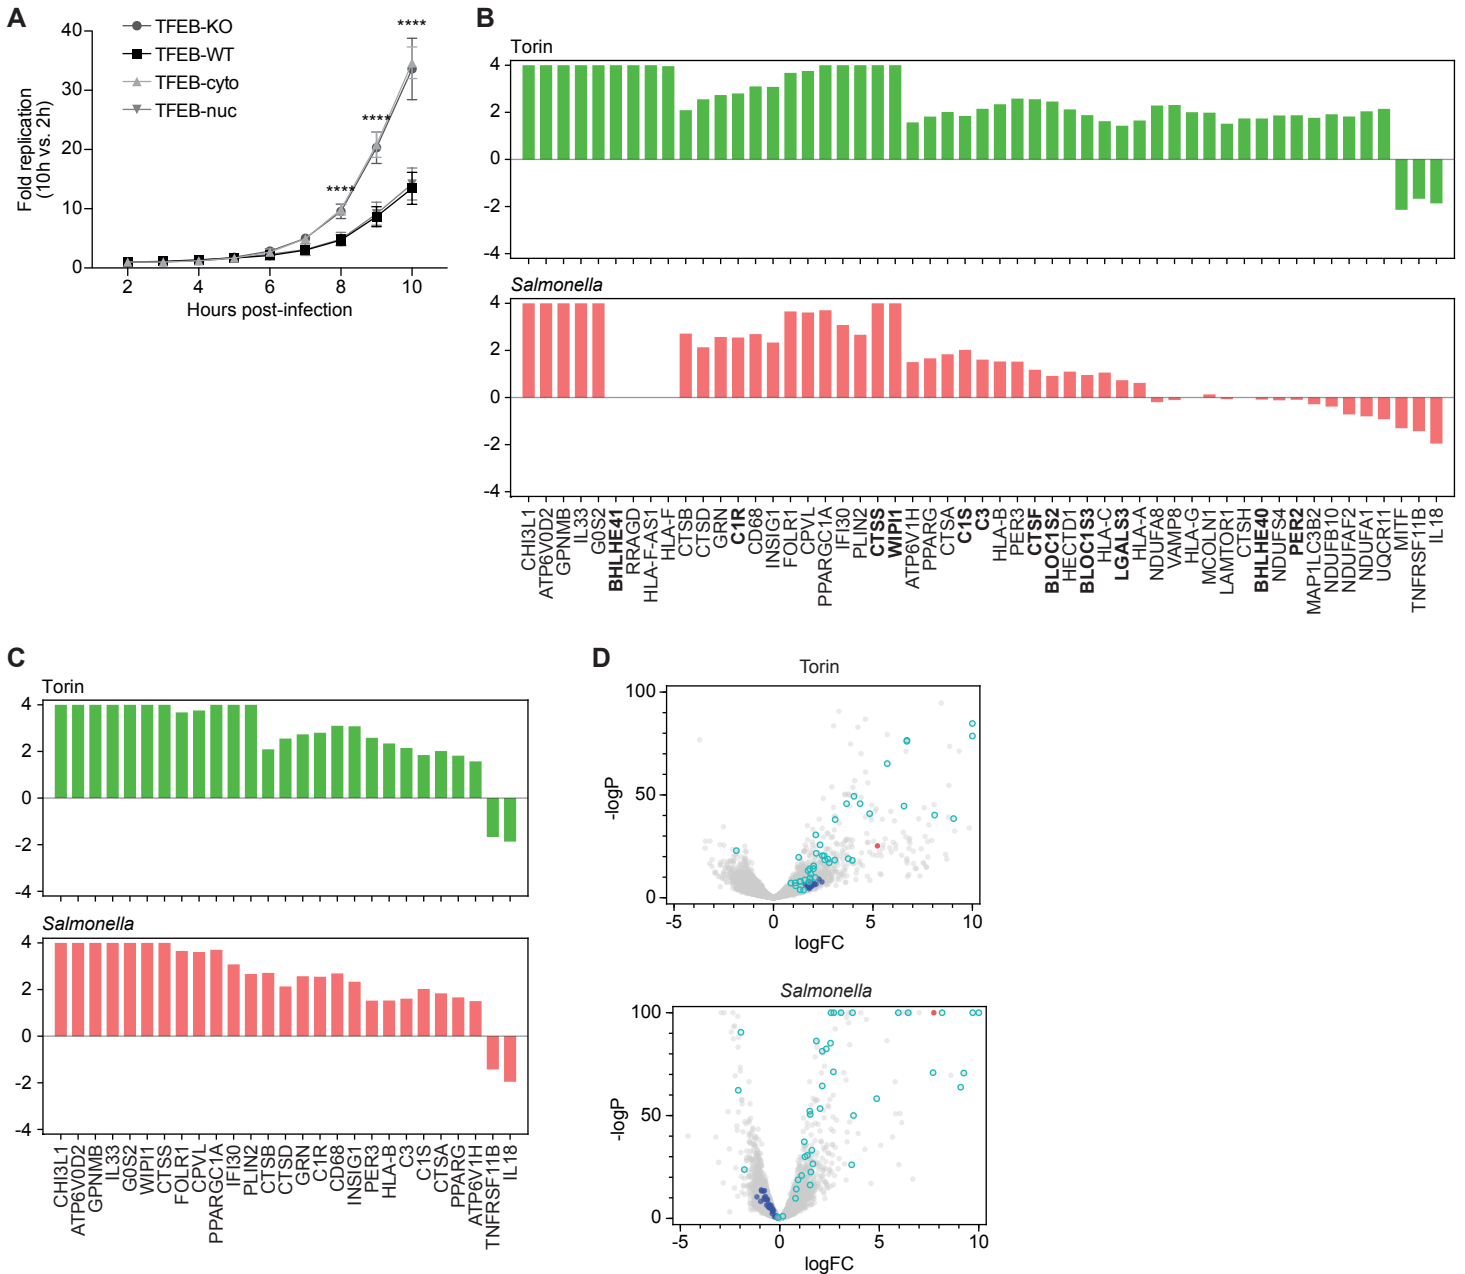

**Figure S5. TFEB nuclear translocation is required for transcriptional response and host defense response to intracellular bacteria. Related to Figure 5. A)** Intracellular bacterial replication in TFEB-KO, TFEB-WT, TFEB-cyto, and TFEB-nuc cells infected with bioluminescent *S. enterica*. Data shown are the average of eight independent wells and representative of three independent experiments. Data were analyzed using repeated measures two-way ANOVA with Geisser-Greenhouse correction and individual variances computed by Sidak's multiple comparisons test. Data are represented as mean  $\pm$  SEM (standard error of the mean). \*\*\*\* $p < 0.0001$ . **B)** TFEB-KO and TFEB-WT cells were treated with Torin or infected with *S. enterica* then processed for RNA sequencing analysis. Response of select genes differentially expressed between TFEB-WT and TFEB-KO cells following Torin treatment ( $\log_{2}FC > \ln 4$  or  $\log_{2}FC < -\ln 4$  and  $q\text{-value} < 0.01$ ) are shown. A subset of genes differentially expressed following Torin treatment (green) are also differentially expressed in cells infected with *Salmonella* (pink). **C)** TFEB-KO and TFEB-WT cells were treated with Torin or infected with *S. enterica* then processed for RNA sequencing analysis. Select genes differentially expressed between TFEB-WT and TFEB-KO cells in response to both Torin treatment (green) and *Salmonella* infection (pink) ( $\log_{2}FC > \ln 4$  or  $\log_{2}FC < -\ln 4$  and  $q\text{-value} < 0.01$ ) are shown. **D)** Volcano plots illustrate differential gene expression from TFEB-KO and TFEB-WT cell lines treated with Torin (top) or infected with *S. enterica* (bottom). TFEB (red) and select genes functioning in autophagy, lysosome and immune responses (cyan) and mitochondrial respiration (blue) are highlighted.

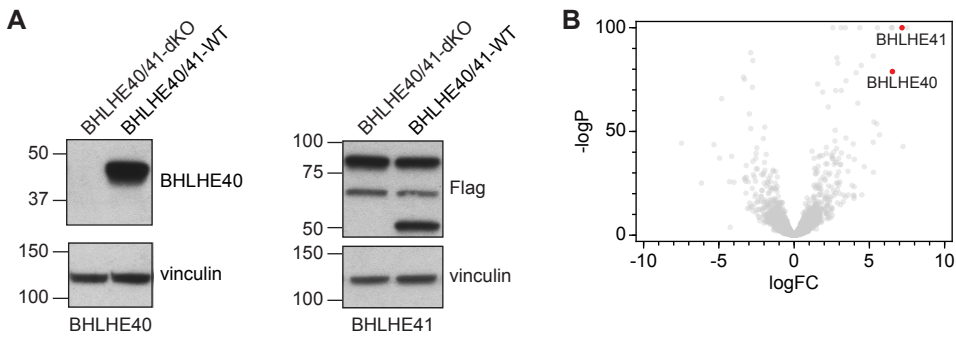

**Figure S6. Re-expression of BHLHE40 and BHLHE41 in BHLHE40/41-dKO cells is detected by immunoblot and RNA sequencing. Related to Figure 7. A)** Immunoblots demonstrate BHLHE40 and BHLHE41 proteins are detected with anti-BHLHE40 and anti-Flag antibodies, respectively, in BHLHE40/41-WT but not BHLHE40/41-dKO cells. Vinculin serves as a loading control. Data are representative of at least two independent experiments. **B)** BHLHE40/41-dKO and BHLHE40/41-WT cell lines were processed for RNA sequencing analysis. As compared to dKO cells, BHLHE40 and BHLHE41 transcript levels (red) are significantly increased upon reconstitution.
